# Supplementary material for: Evidence for Epistatic Interaction between HLA-G and LILRB1 in the Pathogenesis of Nonsegmental Vitiligo
Source: MDPI journal article supplement (doi:10.3390/cells12040630), 2023-02-15
Supplement: s1 [file s1]

## Supplementary data

**Supplementary Table 1:** Significant second-order interactions identified by MB-MDR.

| SNP1        | SNP1 location              | SNP2        | SNP2 location              | betaH  | WH    | betaL   | WL    | Wmax  | p-value |
|-------------|----------------------------|-------------|----------------------------|--------|-------|---------|-------|-------|---------|
| rs2114511   | synonymous - <i>LILRB1</i> | rs9380142   | 3'UTR - <i>HLA-G</i>       | 0.9899 | 9.081 | -10.347 | 7.476 | 9.081 | 0.013   |
| rs61739244  | synonymous - <i>LILRB1</i> | rs9380142   | 3'UTR - <i>HLA-G</i>       | 0.9811 | 8.864 | -0.7897 | 5.411 | 8.864 | 0.021   |
| rs1061684   | synonymous - <i>LILRB1</i> | rs9380142   | 3'UTR - <i>HLA-G</i>       | 0.9320 | 7.646 | NA      | NA    | 7.646 | 0.026   |
| rs148624633 | missense - <i>LILRB1</i>   | rs9380142   | 3'UTR - <i>HLA-G</i>       | 0.7986 | 5.935 | -0.9103 | 6.974 | 6.974 | 0.027   |
| rs28405793  | synonymous - <i>LILRB1</i> | rs148624633 | missense - <i>LILRB1</i>   | 20.721 | 6.816 | NA      | NA    | 6.816 | 0.028   |
| rs61738512  | missense - <i>LILRB1</i>   | rs9380142   | 3'UTR - <i>HLA-G</i>       | 0.7432 | 5.157 | -0.9374 | 7.394 | 7.394 | 0.029   |
| rs383369    | missense - <i>LILRB2</i>   | rs373032    | synonymous - <i>LILRB2</i> | 0.9112 | 7.334 | NA      | NA    | 7.334 | 0.030   |
| rs373032    | synonymous - <i>LILRB2</i> | rs386056    | missense - <i>LILRB2</i>   | 0.9291 | 7.762 | NA      | NA    | 7.762 | 0.031   |
| rs2114511   | synonymous - <i>LILRB1</i> | rs72492280  | 5'UTR - <i>HLA-G</i>       | 10.407 | 6.795 | NA      | NA    | 6.795 | 0.031   |
| rs366337    | synonymous - <i>LILRB2</i> | rs2114511   | synonymous - <i>LILRB1</i> | 0.9433 | 5.931 | NA      | NA    | 5.931 | 0.031   |
| rs373032    | synonymous - <i>LILRB2</i> | rs2114511   | synonymous - <i>LILRB1</i> | 11.179 | 7.521 | NA      | NA    | 7.521 | 0.033   |
| rs9380142   | 3'UTR - <i>HLA-G</i>       | rs1632950   | 5'UTR - <i>HLA-G</i>       | 10.081 | 7.893 | -11.585 | 5.547 | 7.893 | 0.034   |
| rs2114511   | synonymous - <i>LILRB1</i> | rs12722482  | missense - <i>HLA-G</i>    | 0.9749 | 6.380 | -0.5995 | 3.056 | 6.380 | 0.034   |
| rs2114511   | synonymous - <i>LILRB1</i> | rs61739244  | synonymous - <i>LILRB1</i> | 0.8824 | 4.515 | -0.6454 | 2.929 | 4.515 | 0.034   |
| rs9380142   | 3'UTR - <i>HLA-G</i>       | rs17179101  | 3'UTR - <i>HLA-G</i>       | 0.8581 | 6.834 | -0.8586 | 5.986 | 6.834 | 0.035   |
| rs1061684   | synonymous - <i>LILRB1</i> | rs2114511   | synonymous - <i>LILRB1</i> | 11.535 | 6.019 | NA      | NA    | 6.019 | 0.044   |
| rs386056    | missense - <i>LILRB2</i>   | rs41557518  | frameshift - <i>HLA-G</i>  | 14.267 | 6.071 | NA      | NA    | 6.071 | 0.047   |
| rs73938625  | 5'UTR - <i>LILRB2</i>      | rs9380142   | 3'UTR - <i>HLA-G</i>       | 0.7843 | 5.729 | -0.6923 | 4.261 | 5.729 | 0.047   |
| rs73055442  | missense - <i>LILRB2</i>   | rs9380142   | 3'UTR - <i>HLA-G</i>       | 0.8324 | 6.433 | -0.6544 | 3.809 | 6.433 | 0.048   |
| rs9380142   | 3'UTR - <i>HLA-G</i>       | rs41557518  | frameshift - <i>HLA-G</i>  | 0.7617 | 5.404 | -0.8583 | 5.985 | 5.985 | 0.048   |

$p$ -value  $\leq 0.05$  was considered significant.
